# Supplementary material for: Maternal Emotion Regulation Strategies and Child Outcomes: A Comparison of Interpersonal and Intrapersonal Regulation
Source: Research Square preprint supplement (doi:10.21203/rs.3.rs-8195910/v1), 2025-12-11
Supplement: Supplementary file 1 [file 23c448711d9bc47e2ba35bbd.docx]

**Tables**

**Table 1**

*Descriptive Statistics and Bivariate Correlations among Study Variables*

| Variable | *M* | *SD* | 1 | 2 | 3 | 4 | 5 | 6 | 7 | 8 | 9 | 10 | 11 |
| --- | --- | --- | --- | --- | --- | --- | --- | --- | --- | --- | --- | --- | --- |
| 1. Income | 4.650 | 2.588 | __ |  |  |  |  |  |  |  |  |  |  |
| 1. ERQ Reappraisal | 5.238 | 1.045 | -.003 | __ |  |  |  |  |  |  |  |  |  |
| 1. ERQ Suppression | 2.812 | 1.177 | -.158† | -.104 | __ |  |  |  |  |  |  |  |  |
| 1. IERQ Positive affect | 18.419 | 4.085 | .111 | .026 | -.377*** | __ |  |  |  |  |  |  |  |
| 1. IERQ Perspective taking | 12.121 | 4.560 | -.014 | -.140 | -.019 | .273** | __ |  |  |  |  |  |  |
| 1. IERQ Soothing | 14.089 | 5.169 | .257** | -.107 | -.406*** | .504*** | .489*** | __ |  |  |  |  |  |
| 1. IERQ Social modeling | 16.895 | 4.424 | .061 | .037 | -.278** | .380*** | .523*** | .521*** | __ |  |  |  |  |
| 1. Cortisol levels | -15.874 | 166.892 | .116 | .069 | .110 | -.050 | .022 | -.144 | -.200 | __ |  |  |  |
| 1. Executive functioning | -.038 | .804 | -.075 | -.058 | .037 | -.135 | -.149 | -.188* | -.143 | -.022 | __ |  |  |
| 1. Internalizing problems | 4.950 | 4.168 | -.021 | -.184* | .122 | .010 | .113 | .036 | .129 | .027 | -.072 | __ |  |
| 1. Externalizing problems | 12.240 | 8.679 | .072 | -.225** | -.056 | .076 | .080 | .196* | .109 | -.023 | -.179* | .603*** | __ |

*Note.* ERQ = Emotion Regulation Questionnaire; IERQ = Interpersonal Emotion Regulation Questionnaire; M = Mean; SD = standard deviation.

†*p* < .10, **p* < .05, ***p* < .01,*** *p* < .001.

**Table 2**

*Regression Analyses of the Associations between Parents’ Interpersonal and Intrapersonal Regulation Strategies with Child Outcomes*

|  | Cortisol levels | | | |  | Executive functioning | | | |  | Internalizing problems | | | |  | Externalizing problems | | | |
| --- | --- | --- | --- | --- | --- | --- | --- | --- | --- | --- | --- | --- | --- | --- | --- | --- | --- | --- | --- |
| Variable | *β* | *SE* | *z* | *p* |  | *β* | *SE* | *z* | *p* |  | *β* | *SE* | *z* | *p* |  | *β* | *SE* | *z* | *p* |
| Gender | .130 | .325 | 1.331 | .183 |  | .020 | .131 | .250 | .830 |  | -.120 | .681 | -1.459 | .145 |  | -.137 | 1.428 | -1.663 | .096 |
| Race | .074 | .321 | .801 | .423 |  | -.046 | .141 | -.542 | .588 |  | -.142 | .913 | -1.342 | .179 |  | -.037 | 1.743 | -.379 | .705 |
| Income | .147 | .058 | 1.637 | .102 |  | -.047 | .029 | -.507 | .612 |  | .027 | .195 | .220 | .826 |  | .020 | .321 | .204 | .838 |
| Time of cortisol collection | -.066 | .123 | -.580 | .562 |  |  |  |  |  |  |  |  |  |  |  |  |  |  |  |
| ERQ Reappraisal | .078 | .149 | .841 | .400 |  | -.075 | .073 | -.793 | .428 |  | -.177 | .346 | -2.039 | .041 |  | -.221 | .790 | -2.317 | .020 |
| ERQ Suppression | .032 | .124 | .363 | .716 |  | -.049 | .081 | -.412 | .680 |  | .145 | .369 | 1.391 | .164 |  | .009 | .681 | .093 | .926 |
| IERQ Positive affect | .075 | .031 | .984 | .325 |  | -.026 | .021 | -.243 | .808 |  | .079 | .097 | .824 | .410 |  | .033 | .209 | .332 | .740 |
| IERQ Perspective taking | .232 | .055 | 1.536 | .125 |  | -.090 | .021 | -.775 | .438 |  | -.038 | .115 | -.304 | .761 |  | -.092 | .259 | -.674 | .500 |
| IERQ Soothing | -.199 | .033 | -1.931 | .053 |  | -.100 | .022 | -.701 | .483 |  | -.011 | .087 | -.103 | .918 |  | .183 | .214 | 1.431 | .152 |
| IERQ Social modeling | -.268 | .042 | -2.434 | .015 |  | -.025 | .022 | -.206 | .837 |  | .196 | .088 | 1.856 | .063 |  | .073 | .231 | .622 | .534 |

*Note.* Gender was coded 1 for female and 0 for male. Race was coded 1 for White and 0 for others. ERQ = Emotion Regulation Questionnaire; IERQ = Interpersonal Emotion Regulation Questionnaire; M = Mean; SD = standard deviation.

**Table 3**

*Reduced Model of the Associations between Parents’ Interpersonal Regulation (i.e., Social Modelling) and Intrapersonal Regulation Strategies (i.e. Cognitive Reappraisal) with Child Outcomes*

|  | Cortisol levels | | | |  | Executive functioning | | | |  | Internalizing problems | | | |  | Externalizing problems | | | |
| --- | --- | --- | --- | --- | --- | --- | --- | --- | --- | --- | --- | --- | --- | --- | --- | --- | --- | --- | --- |
| Variable | *β* | *SE* | *z* | *p* |  | *β* | *SE* | *z* | *p* |  | *β* | *SE* | *z* | *p* |  | *β* | *SE* | *z* | *p* |
| Gender | .141 | .332 | 1.410 | .158 |  | .015 | .132 | .180 | .857 |  | -.120 | .642 | -1.549 | .121 |  | -.127 | 1.350 | -1.630 | .103 |
| Race | .073 | .318 | .799 | .424 |  | -.029 | .141 | -.348 | .728 |  | -.143 | .806 | -1.534 | .125 |  | -.020 | 1.566 | -.232 | .817 |
| Income | .114 | .058 | 1.267 | .205 |  | -.064 | .027 | -.721 | .471 |  | .011 | .188 | .092 | .927 |  | .064 | .326 | .655 | .513 |
| Time of cortisol collection | -.043 | .132 | -.374 | .708 |  |  |  |  |  |  |  |  |  |  |  |  |  |  |  |
| ERQ Reappraisal | .096 | .122 | 1.109 | .267 |  | -.053 | .069 | -.583 | .560 |  | -.181 | .323 | -2.239 | .025 |  | -.228 | -1.895 | .751 | .012 |
| IERQ Social modeling | -.188 | .031 | -2.263 | .024 |  | -.140 | .019 | -1.336 | .182 |  | .156 | .072 | 2.039 | .041 |  | .128 | .177 | 1.421 | .155 |

*Note.* Gender was coded 1 for female and 0 for male. Race was coded 1 for White and 0 for others. ERQ = Emotion Regulation Questionnaire; IERQ = Interpersonal Emotion Regulation Questionnaire; M = Mean; SD = standard deviation.
